# Supplementary material for: Online reaction monitoring by single-scan 2D NMR under flow conditions
Source: Royal Society of Chemistry journal article supplement (doi:10.1039/c9an01758e), 2019-11-12
Supplement: c9an01758e1.pdf [file c9an01758e1.pdf]

Supporting information for  
*Online reaction monitoring by single-scan 2D NMR under flow conditions*

Corentin Jacquemmoz<sup>a</sup>, François Giraud<sup>b</sup> and Jean-Nicolas Dumez<sup>a\*</sup>

<sup>a</sup>. CEISAM, CNRS UMR6230, Université de Nantes, 44300 Nantes, France

<sup>b</sup>. ICSN, CNRS UPR2301, Univ. Paris Sud, Université Paris-Saclay, 91190 Gif sur Yvette, France

I. Effect of the direction of the frequency sweep

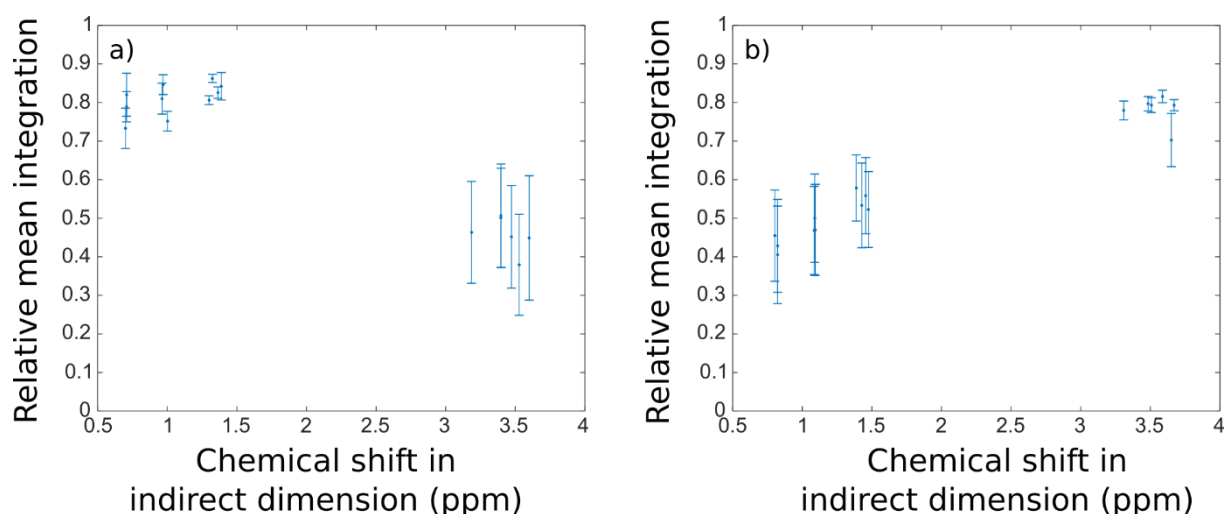

Figure\_SI 1: Mean integration of several peaks in ufCOSY with flow of 2.5 mL/min relative to maximum integration without flow as a function of chemical shift of the peaks in indirect dimension using chirp sweeping high to low field (a) and low to high field (b).

## II. Kinetics at several temperatures

### A. Experimental section

**Saponification reaction.** The saponification reaction was prepared according the following procedure. First, temperature regulation of the probe was set to the desired temperature (25, 35 or 45°C) and the probe was tuned on a tube containing ethanol and sodium acetate at 25 mM in purified undeuterated water. At room temperature, in a 100 mL round-bottom flask with magnetic agitation, 50 mL of purified and degassed water were used to dissolve 119  $\mu$ L of ethyl acetate (1 eq, 25 mM). The flask was heated to the selected temperature (25, 35 or 45°C) in a bain-marie. The solution was fed to the flow tube with a flow rate of 3 mL/min until the solution returned to the flask while the transfer line was heated to the desired temperature using a thermostatic water bath. With this setup, the dead time before the system equilibrates is about 1 minute and 40 seconds. A series of acquisition were repeated every 15 s interlacing 1D  $^1\text{H}$  and ufcOSY experiments with spatial encoding on X-axis. This 15 s delay is chosen to avoid any damage to the probe, and provides a repetition time that is still much shorter than with conventional (non-UF) experiments). After the end of the fourth UF experiment, 125  $\mu$ L of 10M NaOH (1 eq, 25 mM) was added in the reaction mixture. The acquisitions continued for about 40 min.

**NMR experiments.** For UfcOSY experiments on the saponification reaction at 25 °C, bipolar encoding gradients of  $\pm 0.0075$  (on X-axis) T/m were used in combination with 15 ms chirp pulses with 12 kHz bandwidth. The acquisition consisted of a train bipolar gradient pulses of or  $\pm 0.374$  (X-axis) T/m acquisition gradient, with 150 loops and a duration of 190  $\mu$ s for each gradient pulse. A relaxation delay of 14.79 s was used including 5 s of presaturation. The excitation sculpting block was composed of a pair a 2 ms trapezoidal pulses and hard  $\pi$  pulse surrounded by a pair of 1 ms gradient pulses (Y axis).

In order to avoid water peak to fold back on peaks of interests, UfcOSY for saponification at 35 and 45°C were slightly changed to use these parameters. For spatial encoding, bipolar encoding gradients of  $\pm 0.0064$  (on X-axis) T/m were used in combination with 15 ms chirp pulses with 12 kHz bandwidth. The acquisition consisted of a train bipolar gradient pulses of or  $\pm 0.374$  (X-axis) T/m acquisition gradient, with 150 loops and a duration of 225  $\mu$ s for each gradient pulse. A relaxation delay of 14.80 s was used including 5 s of presaturation. The excitation sculpting block was composed of a pair a 2 ms trapezoidal pulses and hard  $\pi$  pulse surrounded by a pair of 1 ms gradient pulses (Y axis).

**Data processing.** 1D  $^1\text{H}$  were processed with Topspin 3.6.1 and integration was done using Dynamics Center 2.5.6. The integration values were then imported for processing in MATLAB. ufcOSY processing and integration were done in MATLAB. For fitting, only point from 150 to 700 s after NaOH introduction were taken into account in order to eliminate first points, which correspond to the homogenization in the flow tube, and the last points, which suffer from a too low signal to noise ratio.

**Kinetic measurement.** The saponification of ethyl acetate is known to be a reaction of order 2. In order to evaluate the kinetics of the reaction, the saponifications were done with equal quantities of ethyl acetate and NaOH, so that  $[\text{AcOEt}] = [\text{NaOH}]$ . Then the decay of the concentration of ethyl acetate can be fitted to the equation:

$$\frac{1}{[\text{AcOEt}](t)} = at + b$$

where  $t$  is the reaction time. The reaction rate constant is then equal to  $a$ . Peak volumes can be converted to concentrations by using the known initial concentration of ethyl acetate:

$$[\text{AcOEt}](t) = [\text{AcOEt}]_0 \frac{I(t)}{I_0}$$

Where  $I$  is the peak volume at time  $t$ ,  $I_0$  is the peak volume before the reaction starts, and  $[\text{AcOEt}]_0$  is the initial concentration in ethyl acetate.

B. Kinetic monitoring using 1D  $^1\text{H}$  NMR

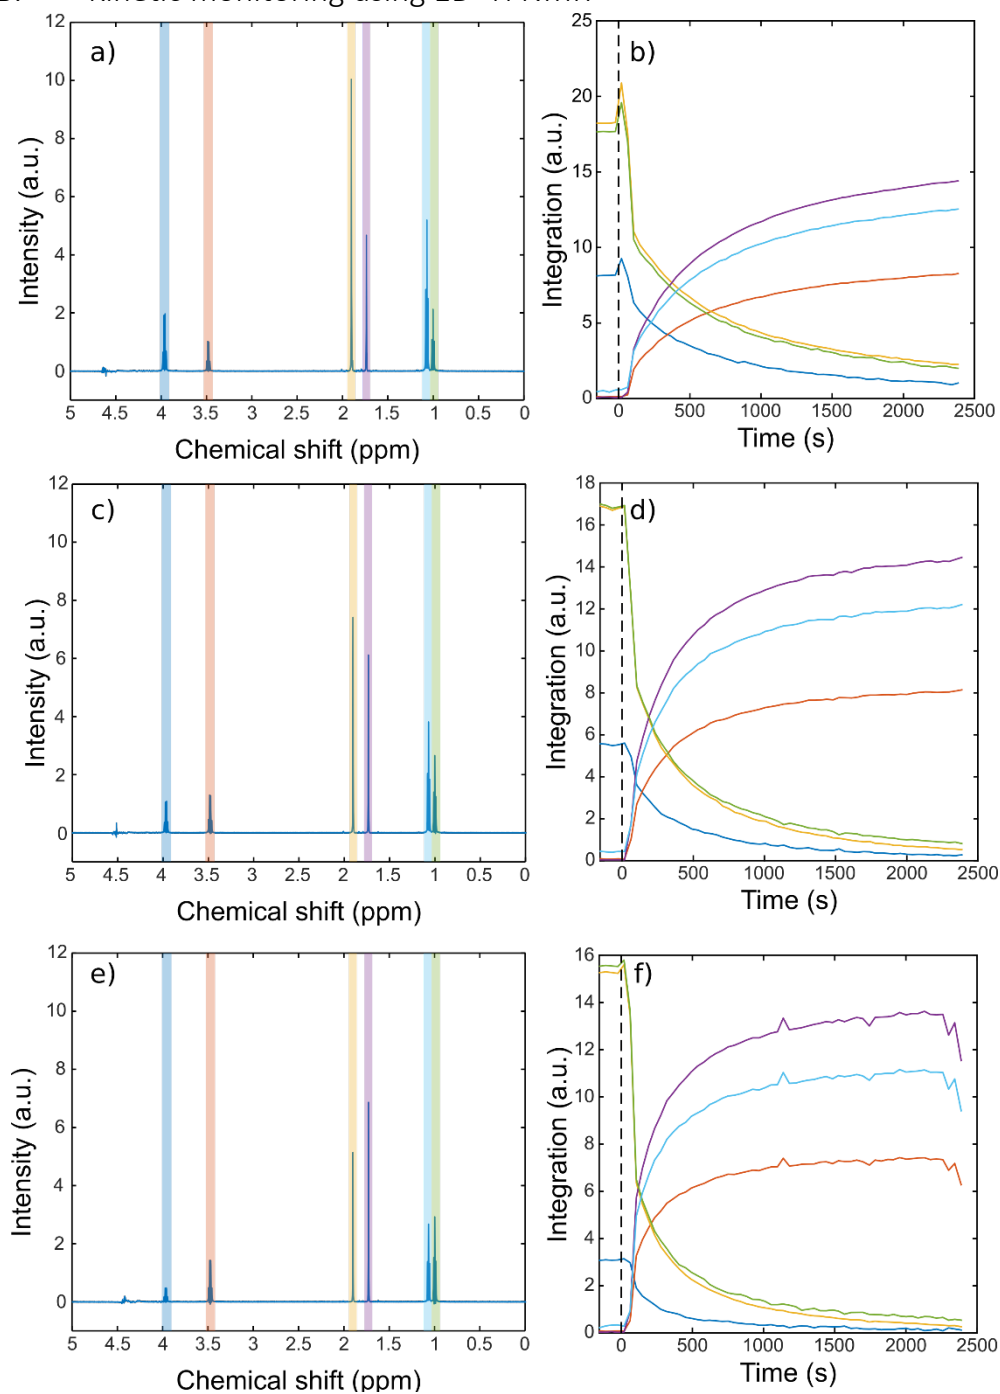

Figure\_SI 2: 1D  $^1\text{H}$  spectra at  $t = 150$  s after the addition of NaOH and evolution of peak integrations for saponifications at  $T = 25^\circ\text{C}$  (a and b),  $35^\circ\text{C}$  (c and d) and  $45^\circ\text{C}$  (e and f). Vertical axes of the three graphs (b, d, f) have the same scale. Dashed lines correspond to the moment the NaOH was introduced in the reaction mixture.

### C. Kinetic monitoring using ufCOSY

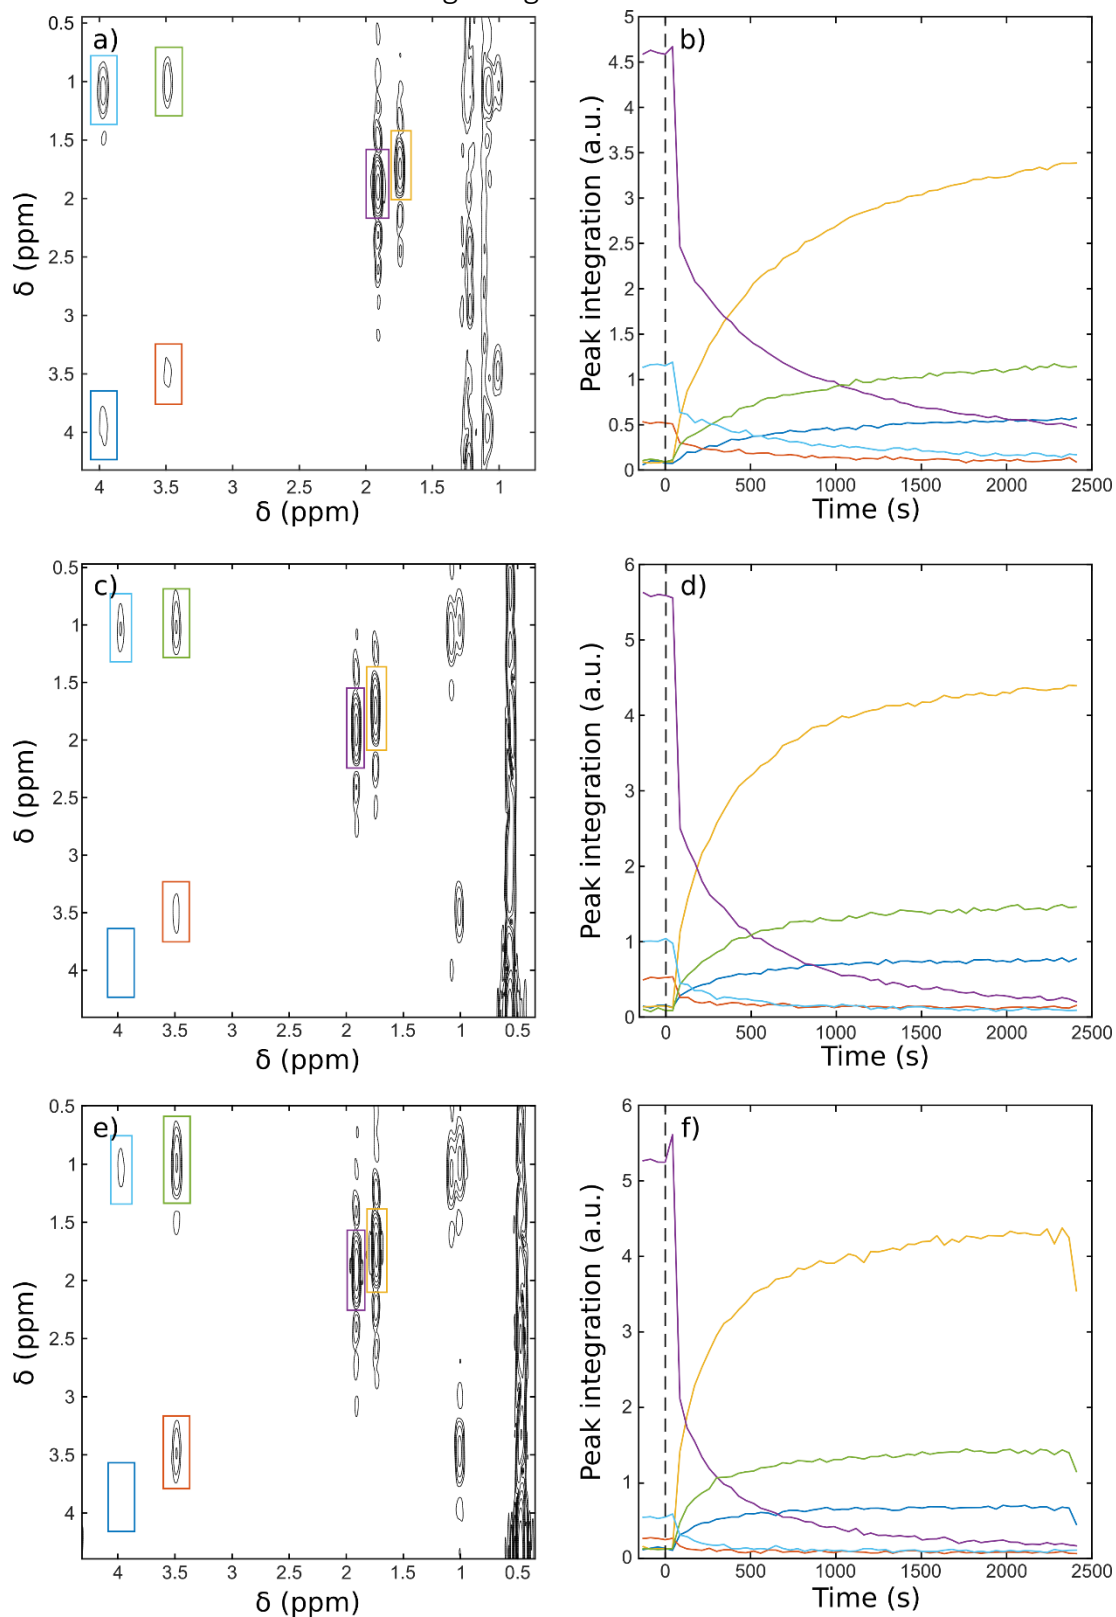

Figure SI 3: ufCOSY spectra at  $t = 175$  s after the addition of NaOH and evolution of peak integrations for saponifications at  $T = 25^\circ\text{C}$  (a and b),  $35^\circ\text{C}$  (c and d) and  $45^\circ\text{C}$  (e and f). Vertical axes of the three graphs (b, d, f) have the same scale. Dashed lines correspond to the moment the NaOH was introduced in the reaction mixture.

#### D. Comparison between 1D $^1\text{H}$ NMR and ufCOSY

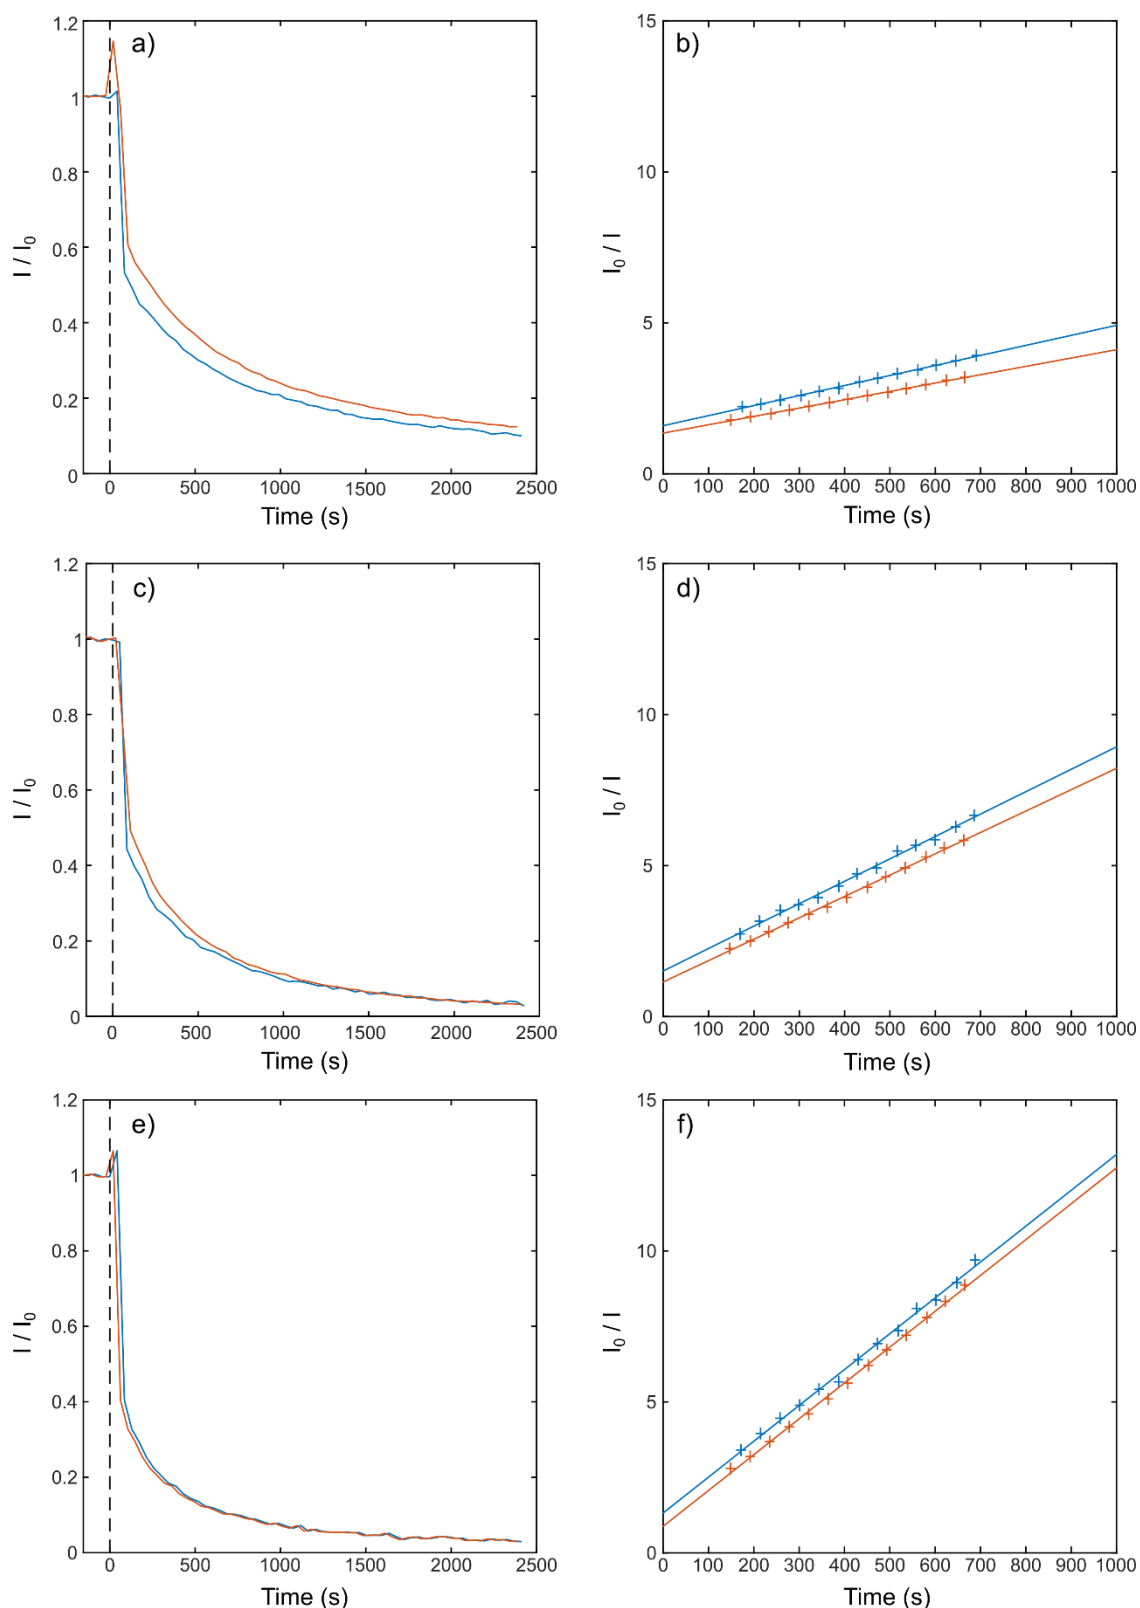

Figure SI 4: (a, c, e) Evolution of ethyl acetate  $\text{CH}_3(\text{CO})$  peak integration as a function of time for saponification at 25°C (a), 35°C (c) and 45°C (e). Blue lines correspond to results obtained with UF experiments and red lines correspond to results obtained with 1D  $^1\text{H}$  experiments. (b, d, f) Fit of the data for times between 150 and 700 s. Blue crosses and lines respectively corresponds to the experimental values and to the fit of results obtained with UF results and red crosses and lines correspond to the experimental values and to the fit of results obtained with 1D  $^1\text{H}$  experiments.

*Table 1: Reaction rates determined by fitting the data shown in Fig.SI 4, obtained with 1D  $^1\text{H}$  NMR experiments and UFGOSY for saponification at 25°C, 35°C and 45°C.*

| Experiment          | $k^{(a)}$ at 25°C (L.mol $^{-1}$ s $^{-1}$ ) | k at 35°C (L.mol $^{-1}$ s $^{-1}$ ) | k at 45°C (L.mol $^{-1}$ s $^{-1}$ ) |
|---------------------|----------------------------------------------|--------------------------------------|--------------------------------------|
| 1D $^1\text{H}$ NMR | 0.11                                         | 0.28                                 | 0.47                                 |
| ufCOSY              | 0.13                                         | 0.30                                 | 0.48                                 |

(a) the difference in rate is tentatively assigned to an inaccurate determination of the proportionality constant between peak volume and concentration in the 1H 2D NMR data.

### E. Arrhenius Plot

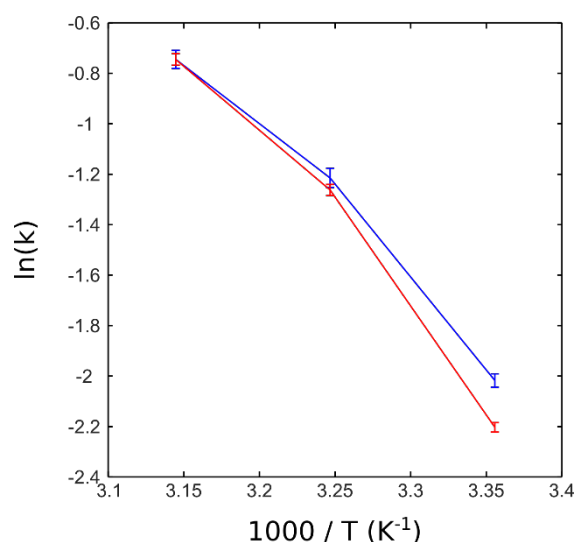

Figure\_SI 5:  $\ln(k)$  as a function of  $1000/T$  for rate constants measured by 1D NMR and UF monitoring at 25, 35 and 45°C. Blue and red lines respectively correspond to the results obtained with UFGOSY and 1D  $^1H$  experiments. The error bars correspond to the error of the fit.

### III. Pulse sequences

#### A. ufcOSY with excitation sculpting

```
;ufcosyes.3
;$CLASS=HighRes
;$DIM=2D
;$TYPE=
;$SUBTYPE=
;$COMMENT=

#include <Avance.incl>
#include <Grad.incl>
#include <De.incl>
#include <Delay.incl>

"p2=2*p1"
"d11=30m"
"p15=(td*dw/(2*I3))-d6"
"p24=p15"
"DELTA = d1-d3"
"TAU=de+p1*2/3.1416+50u"

1 ze
  d11 pl9:f2
  20u st0

; -----relaxation and presaturation
2 30m
  10u ;reset:f1:f2
  DELTA
  d3 cw:f2 ph29
  4u do:f2
  100u UNBLKGRAD
  20u pl1:f1

; -----excitation
  p1 ph1
  d10

; -----spatial encoding step
  p20:gp20
  20u gron0
  p11:sp1:f1 ph1
  20u groff
  p20:gp21
  20u gron1
  p11:sp1:f1 ph2
  20u groff
  p20:gp22

; -----pre-mixing gradient
  20u
  p24:gp24
  10u
```



;------mixing

p23:gp23  
10u  
5u pl1:f1  
p1 ph1  
10u  
p26:gp26  
10u

;------excitation sculpting

p6:gp7  
d16 pl0:f2  
(p12:sp2 ph2:r):f2  
4u  
d12 pl1:f1  
p2 ph3  
4u  
p6:gp7  
d16  
TAU  
p6:gp8  
d16 pl0:f1  
(p12:sp2 ph4:r):f2  
4u  
d12 pl1:f1  
p2 ph3  
4u  
p6:gp8  
d16

;------post-mixing gradient

10u  
p24:gp25  
10u

;------acquisition

ACQ\_START(ph30,ph31)  
1u DWELL\_GEN:f1  
3 p15:gp15  
d6  
p15:gp16  
d6  
lo to 3 times l3  
100u BLKGRAD  
rcyc=2  
100u UNBLKGRAD  
p27:gp27  
100u BLKGRAD  
30m mc #0 to 2 F1QF()  
d17  
exit

ph1=0  
ph2=0 1  
ph3=0  
ph4=0  
ph29=0

ph30=0  
ph31=0 2

;pl1 : f1 channel - power level for pulse (default)  
;sp1: shaped pulse power level for spatial encoding  
;sp2: shaped pulse power level for excitation sculpting  
;p1 : f1 channel - 90 degree high power pulse  
;p12 : f2 channel – 180 shaped pulse for excitation sculpting [2 ms]  
;p23 and p26: coherence-selection gradients for mixing(p23=p26)  
;p20: coherence-selection gradient duration for spatial encoding  
;spnam1 : shaped pulse for spatial encoding  
;spnam2 : shaped pulse for excitation sculpting  
;d1 : relaxation delay;  $1-5 * T1$   
;d3 : presaturation delay,  $< D1$   
;d20 + d6 : acquisition gradient duration  
;p24 : pre and post-mixing gradient duration  
;d17 : delay after experiment (not necessary)  
;GPZ0 : strength for encoding gradient [0-100]  
;GPZ1 : strength for reversed encoding gradient  $GPZ1 = -GPZ0$   
;GPZ2 : strength for acquisition gradient [0-100]  
;GPZ3 : strength for reversed acquisition gradient  $GPZ3 = -GPZ2$   
;GPZ20 : with GPZ21 and GPZ22 coherence-selection gradients for spatial encoding ( $21 = 20 + 22$ )  
;GPZ21 : with GPZ20 and GPZ22: coherence-selection gradients for spatial encoding ( $21 = 20 + 22$ )  
;GPZ22 : with GPZ20 and GPZ21: coherence-selection gradients for spatial encoding ( $21 = 20 + 22$ )  
;GPZ23 and GPZ26: coherence-selection gradients for mixing ( $GPZ26=-GPZ23$ )  
;GPZ24 and GPZ25: pre- and post-mixing gradients  
;GPNAM20=GPNAM21= GPNAM22=GPNAM23=GPNAM26=SINE.100  
;GPNAM24=GPNAM25=RECT.1  
;GPNAM15=GPNAM16=SMSQ10.32  
;NS: 1 (or more if necessary)  
;l3=number of loops for acquisition  
;IMPORTANT: set  $d20 + d6 = DW \times TD(F2)/(2 \times L3)$

## B. ufCOSY with WET

```
;ufcosywetdc.gron
;$CLASS=HighRes
;$DIM=2D
;$TYPE=
;$SUBTYPE=
;$COMMENT=

#include <Avance.incl>
#include <Grad.incl>
#include <De.incl>
#include <Delay.incl>

"d11=30m"
"d15=(td*dw/(2*I3))-d6"
"p24=d15"
"DELTA = d1-d3"
"TAU=de+p1*2/3.1416+50u"

1 ze
  d11 pl9:f2
  20u st0

; -----relaxation and presaturation
2 30m
  10u pl9:f2 ;reset:f1:f2
  DELTA
  d3 cw:f2 ph29
  4u do:f2

;-----WET block with 13C decoupling
  50u UNBLKGRAD
  d12 pl0:f2
  20u cpd2:f3
  (p12:sp7 ph5):f2
  4u
  p16:gp11
  d16 pl0:f2
  (p12:sp8 ph6):f2
  4u
  p16:gp12
  d16 pl0:f2
  (p12:sp9 ph6):f2
  4u
  p16:gp13
  d16 pl0:f2
  (p12:sp10 ph6):f2
  4u do:f3
  p16:gp14
  d16
  10m pl1:f1

;-----excitation

p1 ph1
```

```

d10
;-----spatial encoding step
p20:gp20
20u gron0
p11:sp1:f1 ph1
20u groff
p20:gp21
20u gron1
p11:sp1:f1 ph2
20u groff
p20:gp22

;-----pre-mixing gradient
20u
p24:gp24
10u

;-----mixing
p23:gp23
10u
5u pl1:f1
p1 ph1
10u
p26:gp26
10u

;-----post-mixing gradient
10u
p24:gp25
10u

;-----acquisition
ACQ_START(ph30,ph31)
5u cpd2:f3
1u DWELL_GEN:f1
3 d15 gron15
d6 groff
d15 gron16
d6 groff
lo to 3 times l3
100u BLKGRAD
rcyc=2
100u UNBLKGRAD
p27:gp27
100u BLKGRAD
20u do:f3
30m mc #0 to 2 F1QF()
d17
exit

ph1=0
ph2=0 1
ph3=0
ph4=0
ph5=0
ph6=1
ph29=0

```

ph30=0  
ph31=0 2

;pl1 : f1 channel - power level for pulse (default)  
;sp1: shaped pulse power level for spatial encoding  
;sp7: f2 channel - shaped pulse (to be optimized)  
;sp8: f2 channel - shaped pulse  
;sp9: f2 channel - shaped pulse  
;sp10: f2 channel - shaped pulse  
;p1 : f1 channel - 90 degree high power pulse  
;p12 : f2 channel –90 degree shaped pulse for WET [20 ms]  
;p23 and p26: coherence-selection gradients for mixing (p23=p26)  
;p20: coherence-selection gradient duration for spatial encoding  
;spnam1 : adiabatic chirp pulse for spatial encoding  
;spnam7: Sinc1.1000  
;spnam8: Sinc1.1000  
;spnam9: Sinc1.1000  
;spnam10: Sinc1.1000  
;spnam7 : first selective pulse for WET block  
;spnam8 : second selective pulse for WET block  
;spnam9 : third selective pulse for WET block  
;spnam10 : fourth selective pulse for WET block  
;d1 : relaxation delay; 1-5 \* T1  
;d3 : presaturation delay, < D1  
;d20 + d6 : acquisition gradient duration  
;p16: gradient duration for WET solvent suppression  
;p24 : pre and post-mixing gradient duration  
;d17 : delay after experiment (not necessary)  
;GPZ0 : strength for excitation gradient [0-100]  
;GPZ1 : strength for reversed excitation gradient GPZ1 = -GPZ0  
;GPZ2 : strength for acquisition gradient [0-100]  
;GPZ3 : strength for reversed acquisition gradient GPZ3 = -GPZ2  
;GPZ11: 80%  
;GPZ12: 40%  
;GPZ13: 20%  
;GPZ14: 10%  
;GPZ20 : with GPZ21 and GPZ22 coherence-selection gradients for spatial encoding (21 = 20 + 22)  
;GPZ21 : with GPZ20 and GPZ22: coherence-selection gradients for spatial encoding (21 = 20 + 22)  
;GPZ22 : with GPZ20 and GPZ21: coherence-selection gradients for spatial encoding (21 = 20 + 22)  
;GPZ23 and GPZ26: coherence-selection gradients for mixing (GPZ26=-GPZ23)  
;GPZ24 and GPZ25: pre- and post-mixing gradients  
;GPNAM20=GPNAM21= GPNAM22=GPNAM23=GPNAM26=SINE.100  
;GPNAM11=GPNAM12= GPNAM13=GPNAM14=SMSQ10.100  
;GPNAM24=GPNAM25=RECT.1  
;NS: 1 (or more if necessary)  
;l3=number of loops for acquisition  
;IMPORTANT: set d20 + d6 = DW x TD(F2)/(2xL3)

| ;use power levels                             | sp7   | sp8   | sp9   | sp10  |
|-----------------------------------------------|-------|-------|-------|-------|
| ; shaped pulse powerlevel for 90 degree pulse | +0.87 | -1.04 | +2.27 | -5.05 |

### C. <sup>13</sup>C-ufCOSY with WET solvent suppression and chirp sweeping opposite ways

```
;ufcosywetdc.gron-ChInv
;$CLASS=HighRes
;$DIM=2D
;$TYPE=
;$SUBTYPE=
;$COMMENT=

#include <Avance.incl>
#include <Grad.incl>
#include <De.incl>
#include <Delay.incl>

"p2=2*p1"
"d11=30m"
"d15=(td*dw/(2*I3))-d6"
"p24=d15"
"DELTA = d1-d3"

1 ze
  d11 pl9:f2
  20u st0
; -----relaxation and presaturation
2 30m
  10u pl9:f2 ;reset:f1:f2
  DELTA
  d3 cw:f2 ph29
  4u do:f2

; -----WET block with 13C decoupling
  50u UNBLKGRAD
  d12 pl0:f2
  20u cpd2:f3
  (p12:sp7 ph5):f2
  4u
  p16:gp11
  d16 pl0:f2
  (p12:sp8 ph6):f2
  4u
  p16:gp12
  d16 pl0:f2
  (p12:sp9 ph6):f2
  4u
  p16:gp13
  d16 pl0:f2
  (p12:sp10 ph6):f2
  4u do:f3
  p16:gp14
  d16
  10m pl1:f1

; -----excitation
  p1 ph1
  d10 pl0:f1

; -----spatial encoding step
```

p20:gp19  
20u gron0  
p11:sp1:f1 ph1  
20u groff  
p20:gp20  
20u pl1:f1  
p2 ph1  
p20:gp21  
20u pl0:f1  
20u gron1  
p11:sp2:f1 ph2  
20u groff  
p20:gp22

;-----pre-mixing gradient

20u  
p24:gp24  
10u

;-----mixing

p23:gp23  
10u  
5u pl1:f1  
p1 ph1  
10u  
p26:gp26  
10u

;-----post-mixing gradient

10u  
p24:gp25  
10u

;-----acquisition

ACQ\_START(ph30,ph31)  
5u cpd2:f3  
1u DWELL\_GEN:f1  
3 d15 gron15  
d6 groff  
d15 gron16  
d6 groff  
lo to 3 times l3  
100u BLKGRAD  
rcyc=2  
100u UNBLKGRAD  
p27:gp27  
100u BLKGRAD  
20u do:f3  
30m mc #0 to 2 F1QF()  
d17  
exit

ph1=0  
ph2=0 1  
ph3=0  
ph4=0  
ph5=0

ph6=1  
 ph29=0  
 ph30=0  
 ph31=0 2

;pl1 : f1 channel - power level for pulse (default)  
 ;sp1: shaped pulse power level for spatial encoding  
 ;sp2: shaped pulse power level for spatial encoding  
 ;sp7: f2 channel - shaped pulse (to be optimized)  
 ;sp8: f2 channel - shaped pulse  
 ;sp9: f2 channel - shaped pulse  
 ;sp10: f2 channel - shaped pulse  
 ;p1 : f1 channel - 90 degree high power pulse  
 ;p12 : f2 channel –90 degree shaped pulse for WET [20 ms]  
 ;p23 and p26: coherence-selection gradients for mixing(p23=p26)  
 ;p20: coherence-selection gradient duration for spatial encoding  
 ;spnam1 : adiabatic chirp pulse for spatial encoding  
 ;spnam2 : adiabatic chirp pulse for spatial encoding with sweeping direction opposite to spnam1  
 ;spnam7: Sinc1.1000  
 ;spnam8: Sinc1.1000  
 ;spnam9: Sinc1.1000  
 ;spnam10: Sinc1.1000  
 ;d1 : relaxation delay; 1-5 \* T1  
 ;d3 : presaturation delay, < D1  
 ;d20 + d6 : acquisition gradient duration  
 ;p24 : pre and post-mixing gradient duration  
 ;d17 : delay after experiment (not necessary)  
 ;GPZ0 : strength for excitation gradient [0-100]  
 ;GPZ1 : strength for reversed excitation gradient GPZ1 = -GPZ0  
 ;GPZ2 : strength for acquisition gradient [0-100]  
 ;GPZ3 : strength for reversed acquisition gradient GPZ3 = -GPZ2  
 ;GPZ11: 80%  
 ;GPZ12: 40%  
 ;GPZ13: 20%  
 ;GPZ14: 10%  
 ;GPZ19 and GPZ20 coherence-selection gradients for spatial encoding (19 = 20)  
 ;GPZ20 and GPZ19 coherence-selection gradients for spatial encoding (19 = 20)  
 ;GPZ21 and GPZ22: coherence-selection gradients for spatial encoding (21 = 22)  
 ;GPZ22 and GPZ21: coherence-selection gradients for spatial encoding (21 = 22)  
 ;GPZ23 and GPZ26: coherence-selection gradients for mixing (GPZ26=-GPZ23)  
 ;GPZ24 and GPZ25: pre- and post-mixing gradients  
 ;GPNAM19= GPNAM20=GPNAM21=GPNAM23=GPNAM26=SINE.100  
 ;GPNAM11=GPNAM12= GPNAM13=GPNAM14=SMSQ10.100  
 ;GPNAM24=GPNAM25=RECT.1  
 ;NS: 1 (or more if necessary)  
 ;l3=number of loops for acquisition  
 ;IMPORTANT: set d20 + d6 = DW x TD(F2)/(2xL3)

|                                               |       |       |       |       |
|-----------------------------------------------|-------|-------|-------|-------|
| ;use power levels                             | sp7   | sp8   | sp9   | sp10  |
| ; shaped pulse powerlevel for 90 degree pulse | +0.87 | -1.04 | +2.27 | -5.05 |
